# Supplementary material for: MicroRNA-3200-5p Promotes Osteosarcoma Cell Invasion via Suppression of BRMS1
Source: PubMed Central journal article supplement — Mol Cells. 2018 Jun 11;41(6):523–31. doi: 10.14348/molcells.2018.2200 (PMC6030248; doi:10.14348/molcells.2018.2200), 2018-06-11
Supplement: molce-41-6-523-suppl.pdf [file molce-41-6-523-suppl.pdf]

**Supplementary table: Prediction of BRMS1-binding miRNAs by Bioinformatics**

| miRNA        | Position in the UTR | context++ score |
|--------------|---------------------|-----------------|
| miR-4485-5p  | 76-83               | -0.58           |
| miR-6840-3p  | 536-543             | -0.56           |
| miR-6885-5p  | 465-472             | -0.55           |
| miR-151a-5p  | 178-185             | -0.54           |
| miR-151b     | 178-185             | -0.54           |
| miR-6836-3p  | 449-456             | -0.49           |
| miR-345-5p   | 403-410             | -0.46           |
| miR-328-5p   | 465-472             | -0.46           |
| miR-7976     | 480-487             | -0.45           |
| miR-3184-5p  | 91-98               | -0.42           |
| miR-423-5p   | 91-98               | -0.4            |
| miR-4433a-3p | 266-273             | -0.4            |
| miR-6859-3p  | 422-428             | -0.37           |
| miR-6742-3p  | 47-54               | -0.36           |
| miR-1205     | 68-75               | -0.36           |
| miR-6775-3p  | 365-372             | -0.34           |
| miR-6736-3p  | 207-214             | -0.33           |
| miR-1291     | 365-372             | -0.33           |
| miR-3937     | 250-256             | -0.31           |
| miR-6865-5p  | 256-262             | -0.31           |
| miR-361-3p   | 420-426             | -0.31           |
| miR-4728-5p  | 135-142             | -0.3            |
| miR-6799-5p  | 259-266             | -0.3            |
| miR-4722-5p  | 66-73               | -0.29           |
| miR-6815-5p  | 256-262             | -0.29           |
| miR-4433b-3p | 265-271             | -0.29           |
| miR-4474-3p  | 322-328             | -0.29           |

|              |         |       |
|--------------|---------|-------|
| miR-149-3p   | 135-142 | -0.28 |
| miR-4745-5p  | 263-269 | -0.28 |
| miR-4459     | 267-273 | -0.28 |
| miR-3605-5p  | 327-333 | -0.28 |
| miR-874-3p   | 481-487 | -0.28 |
| miR-4251     | 503-510 | -0.28 |
| miR-6764-5p  | 537-543 | -0.28 |
| miR-4505     | 106-113 | -0.27 |
| miR-8082     | 143-149 | -0.26 |
| miR-4436b-3p | 173-179 | -0.26 |
| miR-1233-5p  | 261-267 | -0.26 |
| miR-6778-5p  | 261-267 | -0.26 |
| miR-4481     | 263-269 | -0.26 |
| miR-626      | 306-312 | -0.26 |
| miR-4743-5p  | 357-363 | -0.26 |
| miR-1915-3p  | 537-543 | -0.26 |
| miR-6883-5p  | 135-142 | -0.25 |
| miR-6879-5p  | 173-179 | -0.25 |
| miR-6740-3p  | 303-310 | -0.25 |
| miR-4764-5p  | 325-331 | -0.25 |
| miR-5588-3p  | 539-545 | -0.25 |
| miR-3972     | 36-42   | -0.24 |
| miR-6783-3p  | 48-54   | -0.24 |
| miR-1343-3p  | 48-54   | -0.24 |
| miR-1289     | 162-168 | -0.24 |
| miR-765      | 165-171 | -0.24 |
| miR-6735-5p  | 173-179 | -0.24 |
| miR-6780a-5p | 260-266 | -0.24 |
| miR-1273h-5p | 260-266 | -0.24 |

|             |         |       |
|-------------|---------|-------|
| miR-6089    | 359-366 | -0.24 |
| miR-18a-3p  | 482-488 | -0.24 |
| miR-6730-5p | 531-537 | -0.24 |
| miR-7160-3p | 132-138 | -0.23 |
| miR-6785-5p | 135-142 | -0.23 |
| miR-4745-5p | 139-145 | -0.23 |
| miR-3616-3p | 174-180 | -0.23 |
| miR-1254    | 220-226 | -0.23 |
| miR-4726-3p | 537-543 | -0.23 |
| miR-2467-3p | 170-176 | -0.22 |
| miR-3934-3p | 244-250 | -0.22 |
| miR-149-3p  | 260-266 | -0.22 |
| miR-4768-3p | 267-273 | -0.22 |
| miR-6827-5p | 289-295 | -0.22 |
| miR-6876-3p | 306-312 | -0.22 |
| miR-6849-3p | 439-445 | -0.22 |
| miR-6720-5p | 439-445 | -0.22 |
| miR-6887-5p | 466-472 | -0.22 |
| miR-125b-5p | 479-485 | -0.22 |
| miR-4319    | 479-485 | -0.22 |
| miR-125a-5p | 479-485 | -0.22 |
| miR-6805-3p | 29-35   | -0.21 |
| miR-1266-5p | 243-249 | -0.21 |
| miR-6851-5p | 258-264 | -0.21 |
| miR-7106-5p | 260-266 | -0.21 |
| miR-6779-5p | 260-266 | -0.21 |
| miR-3687    | 355-361 | -0.21 |
| miR-3166    | 496-502 | -0.21 |
| miR-1202    | 36-42   | -0.2  |

|              |         |       |
|--------------|---------|-------|
| miR-3194-5p  | 36-42   | -0.2  |
| miR-7-5p     | 60-66   | -0.2  |
| miR-3131     | 179-185 | -0.2  |
| miR-6757-5p  | 240-246 | -0.2  |
| miR-4728-5p  | 260-266 | -0.2  |
| miR-30b-3p   | 260-266 | -0.2  |
| miR-1343-5p  | 290-296 | -0.2  |
| miR-942-5p   | 301-308 | -0.2  |
| miR-324-5p   | 345-351 | -0.2  |
| miR-6512-3p  | 439-445 | -0.2  |
| miR-6795-5p  | 466-472 | -0.2  |
| miR-6741-5p  | 45-51   | -0.19 |
| miR-4459     | 65-71   | -0.19 |
| miR-4632-5p  | 173-179 | -0.19 |
| miR-7843-5p  | 173-179 | -0.19 |
| miR-4779     | 176-182 | -0.19 |
| miR-6801-5p  | 216-222 | -0.19 |
| miR-3116     | 220-226 | -0.19 |
| miR-1915-5p  | 223-229 | -0.19 |
| miR-7150     | 253-259 | -0.19 |
| miR-6134     | 257-263 | -0.19 |
| miR-3689a-3p | 260-266 | -0.19 |
| miR-3689c    | 260-266 | -0.19 |
| miR-3689b-3p | 260-266 | -0.19 |
| miR-3134     | 276-282 | -0.19 |
| miR-1225-3p  | 287-293 | -0.19 |
| miR-939-5p   | 290-296 | -0.19 |
| miR-3617-3p  | 335-341 | -0.19 |
| miR-8071     | 430-436 | -0.19 |

|              |         |       |
|--------------|---------|-------|
| miR-6829-3p  | 449-455 | -0.19 |
| miR-7851-3p  | 469-475 | -0.19 |
| miR-6765-3p  | 470-476 | -0.19 |
| miR-4324     | 478-484 | -0.19 |
| miR-3200-5p  | 505-511 | -0.19 |
| miR-6776-5p  | 46-52   | -0.18 |
| miR-3158-5p  | 69-75   | -0.18 |
| miR-5787     | 106-113 | -0.18 |
| miR-4534     | 143-149 | -0.18 |
| miR-4736     | 253-259 | -0.18 |
| miR-1207-5p  | 253-259 | -0.18 |
| miR-6883-5p  | 260-266 | -0.18 |
| miR-1273f    | 278-284 | -0.18 |
| miR-7106-3p  | 372-378 | -0.18 |
| miR-3152-5p  | 450-456 | -0.18 |
| miR-5691     | 29-35   | -0.17 |
| miR-6734-5p  | 92-98   | -0.17 |
| miR-4725-5p  | 97-103  | -0.17 |
| miR-3065-3p  | 123-129 | -0.17 |
| miR-6511b-5p | 187-193 | -0.17 |
| miR-661      | 220-226 | -0.17 |
| miR-139-3p   | 235-241 | -0.17 |
| miR-24-3p    | 245-251 | -0.17 |
| miR-3689d    | 258-264 | -0.17 |
| miR-6798-5p  | 293-299 | -0.17 |
| miR-1265     | 326-332 | -0.17 |
| miR-596      | 349-355 | -0.17 |
| miR-5586-5p  | 440-446 | -0.17 |
| miR-6791-3p  | 449-455 | -0.17 |

|              |         |       |
|--------------|---------|-------|
| miR-4642     | 457-463 | -0.17 |
| miR-146b-3p  | 481-487 | -0.17 |
| miR-873-5p.2 | 67-73   | -0.16 |
| miR-6514-5p  | 142-148 | -0.16 |
| miR-4441     | 242-248 | -0.16 |
| miR-4763-3p  | 253-259 | -0.16 |
| miR-6505-3p  | 314-320 | -0.16 |
| miR-216a-3p  | 386-392 | -0.16 |
| miR-4520-3p  | 428-434 | -0.16 |
| miR-221-5p   | 459-465 | -0.16 |
| miR-331-3p   | 16-22   | -0.15 |
| miR-6804-5p  | 24-30   | -0.15 |
| miR-214-5p   | 74-80   | -0.15 |
| miR-4481     | 139-145 | -0.15 |
| miR-1825     | 152-158 | -0.15 |
| miR-611      | 179-185 | -0.15 |
| miR-6811-5p  | 187-193 | -0.15 |
| miR-6514-3p  | 221-227 | -0.15 |
| miR-6785-5p  | 260-266 | -0.15 |
| miR-5699-5p  | 285-291 | -0.15 |
| miR-6791-5p  | 370-376 | -0.15 |
| miR-488-5p   | 417-423 | -0.15 |
| miR-7109-5p  | 466-472 | -0.15 |
| miR-637      | 467-473 | -0.15 |
| miR-329-5p   | 528-534 | -0.15 |
| miR-3194-3p  | 29-35   | -0.14 |
| miR-6852-5p  | 48-54   | -0.14 |
| miR-4288     | 71-77   | -0.14 |
| miR-5194     | 92-98   | -0.14 |

|              |         |       |
|--------------|---------|-------|
| miR-1233-5p  | 137-143 | -0.14 |
| miR-6847-5p  | 169-175 | -0.14 |
| miR-4518     | 243-249 | -0.14 |
| miR-4292     | 370-376 | -0.14 |
| miR-892b     | 376-382 | -0.14 |
| miR-6745     | 431-437 | -0.14 |
| miR-363-5p   | 431-437 | -0.14 |
| miR-488-5p   | 445-451 | -0.14 |
| miR-6852-5p  | 468-474 | -0.14 |
| miR-4653-5p  | 27-33   | -0.13 |
| miR-939-3p   | 48-54   | -0.13 |
| miR-2861     | 88-94   | -0.13 |
| miR-6778-5p  | 137-143 | -0.13 |
| miR-4645-5p  | 158-164 | -0.13 |
| miR-6754-5p  | 242-248 | -0.13 |
| miR-149-5p   | 375-381 | -0.13 |
| miR-8073     | 459-465 | -0.13 |
| miR-146a-5p  | 476-482 | -0.13 |
| miR-146b-5p  | 476-482 | -0.13 |
| miR-7153-5p  | 476-482 | -0.13 |
| miR-1253     | 502-508 | -0.13 |
| miR-3921     | 27-33   | -0.12 |
| miR-6748-5p  | 83-89   | -0.12 |
| miR-6738-5p  | 92-98   | -0.12 |
| miR-3652     | 107-113 | -0.12 |
| miR-6780a-5p | 136-142 | -0.12 |
| miR-8082     | 237-243 | -0.12 |
| miR-4270     | 242-248 | -0.12 |
| miR-4442     | 355-361 | -0.12 |

|              |         |       |
|--------------|---------|-------|
| miR-4261     | 381-387 | -0.12 |
| miR-3138     | 429-435 | -0.12 |
| miR-3173-5p  | 481-487 | -0.12 |
| miR-6799-3p  | 481-487 | -0.12 |
| miR-766-5p   | 63-69   | -0.11 |
| miR-4319     | 95-101  | -0.11 |
| miR-140-3p.1 | 118-124 | -0.11 |
| miR-1972     | 156-162 | -0.11 |
| miR-4673     | 158-164 | -0.11 |
| miR-4323     | 286-292 | -0.11 |
| miR-3191-5p  | 300-306 | -0.11 |
| miR-128-3p   | 386-392 | -0.11 |
| miR-6778-3p  | 449-455 | -0.11 |
| miR-589-5p   | 476-482 | -0.11 |
| miR-6761-5p  | 504-510 | -0.11 |
| miR-4421     | 73-79   | -0.1  |
| miR-6793-5p  | 83-89   | -0.1  |
| miR-134-3p   | 84-90   | -0.1  |
| miR-4524a-3p | 233-239 | -0.1  |
| miR-617      | 314-320 | -0.1  |
| miR-451b     | 332-338 | -0.1  |
| miR-4308     | 370-376 | -0.1  |
| miR-3681-3p  | 386-392 | -0.1  |
| miR-2861     | 462-468 | -0.1  |

The context++ score for a specific site has been recently developed as an improved quantitative model of canonical targeting, using a compendium of experimental datasets to minimize confounding biases. The context++ score considers site type and another 14 features to predict the most effectively targeted mRNAs, in which It drives the latest version of TargetScan (v7.0; [targetscan.org](http://targetscan.org)), thereby providing a



valuable resource for placing miRNAs into gene-regulatory networks. Predicted targets of each miRNA family are sorted by total context++ score. The representative miRNA is the miRNA in its family with the most favorable (lowest) total context++ score.
